## RETRACTION

# Retraction: Nutritional status, antioxidant activity and total phenolic content of different fruits and vegetables' peels

The *PLOS ONE* Editors

The *PLOS ONE* Editors retract this article [1] because it was identified as one of a series of submissions for which we have concerns about authorship, competing interests, and peer review. We regret that the issues were not addressed prior to the article's publication.

YS, TJ, AM, and JHA did not agree with the retraction. RJ, MSA, MSE, MRAG, and RAR either did not respond directly or could not be reached.

## Reference

1. Sadeef Y, Javed T, Javed R, Mahmood A, Alwahibi MS, Elshikh MS, et al. (2022) Nutritional status, antioxidant activity and total phenolic content of different fruits and vegetables' peels. *PLoS ONE* 17(5): e0265566. <https://doi.org/10.1371/journal.pone.0265566> PMID: 35552543

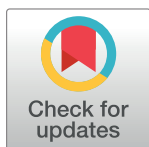

## OPEN ACCESS

**Citation:** The *PLOS ONE* Editors (2024) Retraction: Nutritional status, antioxidant activity and total phenolic content of different fruits and vegetables' peels. *PLoS ONE* 19(12): e0316245. <https://doi.org/10.1371/journal.pone.0316245>

**Published:** December 18, 2024

**Copyright:** © 2024 The *PLOS ONE* Editors. This is an open access article distributed under the terms of the [Creative Commons Attribution License](https://creativecommons.org/licenses/by/4.0/), which permits unrestricted use, distribution, and reproduction in any medium, provided the original author and source are credited.
